# Supplementary material for: Control of up-to-down/down-to-up light-induced ferroelectric polarization reversal
Source: Royal Society of Chemistry journal article supplement (doi:10.1039/d2mh00644h), 2022-01-01
Supplement: d2mh00644h1.pdf [file d2mh00644h1.pdf]

## Electronic Supplementary Information

### Control of up-to-down/down-to-up light induced ferroelectric polarization reversal

Huan Tan,<sup>a</sup> Gustavo Castro,<sup>b</sup> Jike Lyu,<sup>a</sup> Pablo Loza-Alvarez,<sup>b</sup> Florencio Sánchez,<sup>a</sup> Josep Fontcuberta,<sup>a</sup> and Ignasi Fina,<sup>\*a</sup>

<sup>a</sup>Institut de Ciència de Materials de Barcelona (ICMAB-CSIC), Campus UAB, Bellaterra 08193, Barcelona, Spain. E-mail: ifina@icmab.es

<sup>b</sup>ICFO-Institut de Ciències Fòniques, The Barcelona Institute of Science and Technology, 08860, Castelldefels, Barcelona, Spain

Table S1. Summary of LSMO+LNO (which overlap) LNO, SRO and BTO lattice parameters, for BTO/LSMO, BTO/LNO and BTO/SRO samples extracted from RSM data of Figure 1. (\*) indicates that bulk values are for LSMO.

| Diffraction peak | Parameter | Bulk  | BTO/LSMO/LNO | BTO/LNO | BTO/SRO/LSMO |
|------------------|-----------|-------|--------------|---------|--------------|
| LAO              | a (Å)     | 3.79  |              |         |              |
|                  | c (Å)     | 3.79  |              |         |              |
| LSMO+LNO         | a (Å)     | 3.88* | 3.805        |         |              |
|                  | c (Å)     | 3.88* | 3.956        |         |              |
| LNO              | a (Å)     | 3.83  |              | 3.79    | 3.79         |
|                  | c (Å)     | 3.83  |              | 3.939   | 3.936        |
| SRO              | a (Å)     | 3.93  |              |         | 3.95         |
|                  | c (Å)     | 3.93  |              |         | 3.96         |
| BTO              | a (Å)     | 3.994 | 4.003        | 4.005   | 4.016        |
|                  | c (Å)     | 4.038 | 4.110        | 4.093   | 4.090        |

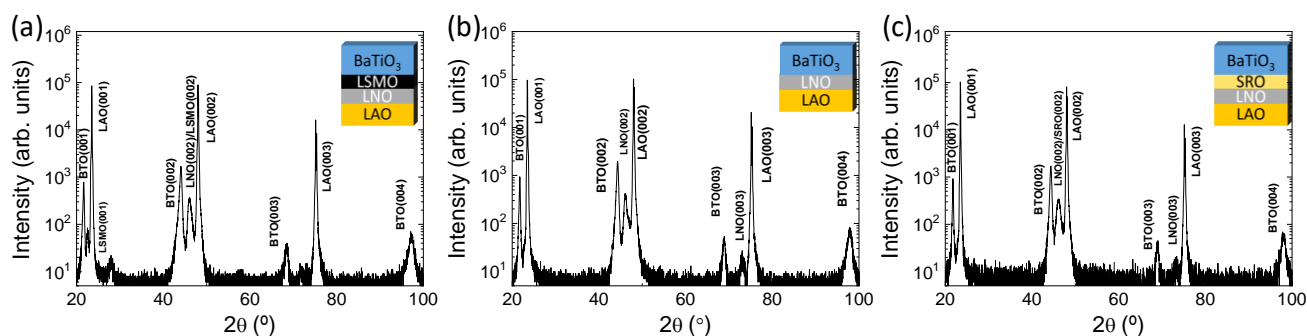

Fig. S1 XRD  $\theta$ - $2\theta$  specular scan of the (a) BTO/LSMO, (b) BTO/LNO and (c) BTO/SRO samples.

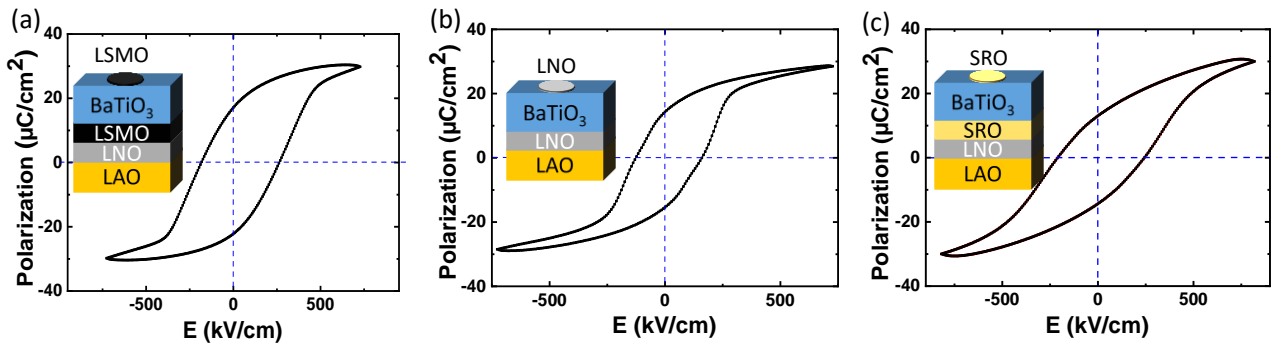

**Fig. S2** (a,b,c) Ferroelectric hysteresis P-E loops of the BTO/LSMO, BTO/LNO and BTO/SRO samples, respectively. The loops are collected grounding the bottom electrode and biasing the top one, i.e. LSMO, LNO or SRO depending on the sample. In this configuration, the ferroelectric nature of the three films is clearly revealed by the shown plots. Note that  $E_{imp}$  resulting from the ferroelectric/electrode interface cancels out.<sup>6</sup> Therefore, in this configuration, only the  $E_{imp}$  resulting from the bulk of the film remains and it can be observed that it is negligible.

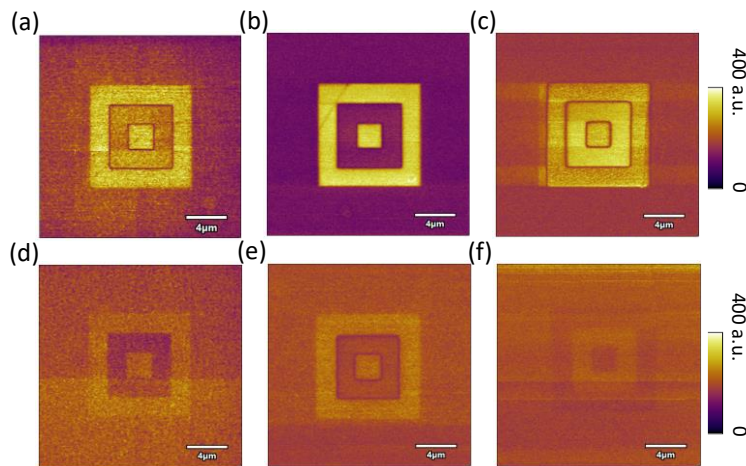

**Fig. S3** PFM amplitude images collected (a,b,c) before and (d,e,f) after illumination for the BTO/LSMO, BTO/LNO and BTO/SRO samples, respectively. Note that in all panels there is some contrast related to charging specially for the sample for the BTO/LNO sample in panel b. Charging does not preclude the observation of near zero signal in panels (a,b,c,e) at the domain walls as expected for intrinsic ferroelectric response.

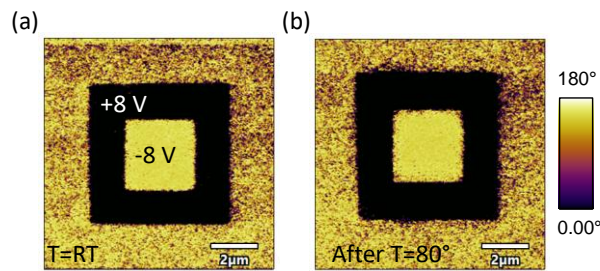

**Fig. S4** PFM phase images collected (a) before and (b) after heating up to 80°C during 10 min for the BTO/LSMO sample.

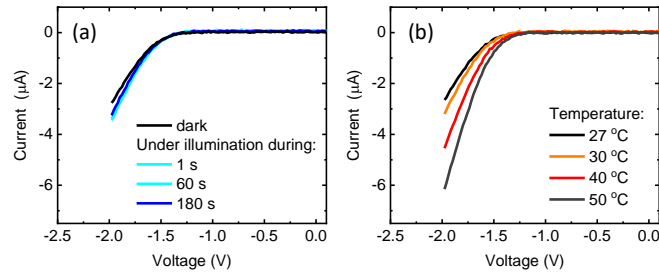

**Fig. S5** (a) I-V characteristics in dark and under illumination during indicated time. (b) I-V characteristics at indicated temperatures.

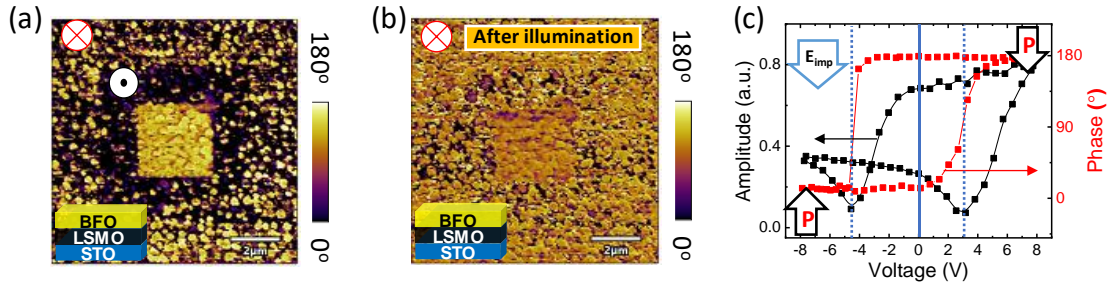

**Fig. S6** (a, b) PFM phase images collected before and after illumination, as indicated, for a BFO/LSMO//SrTiO<sub>3</sub>(001) sample grown by chemical vapor deposition. (c) PFM amplitude and phase loops.

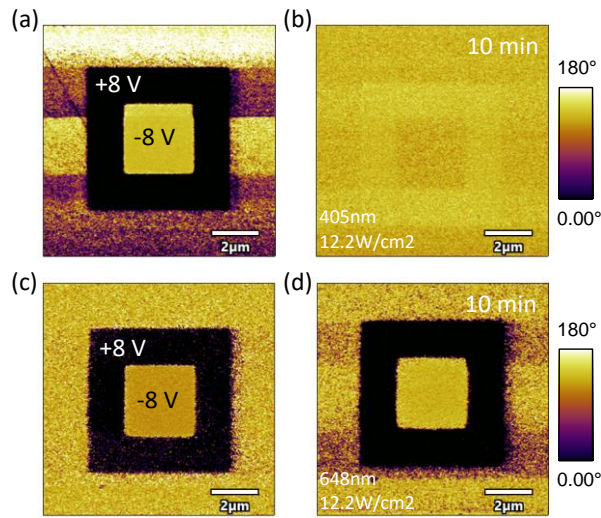

**Fig. S7** PFM phase images collected (a) before and (b) after illumination of 405 nm and 12.2 W/cm<sup>2</sup> for the BTO/LSMO sample. PFM phase images collected (c) before and (d) after illumination of 648 nm and 12.2 W/cm<sup>2</sup> for the BTO/LSMO sample.

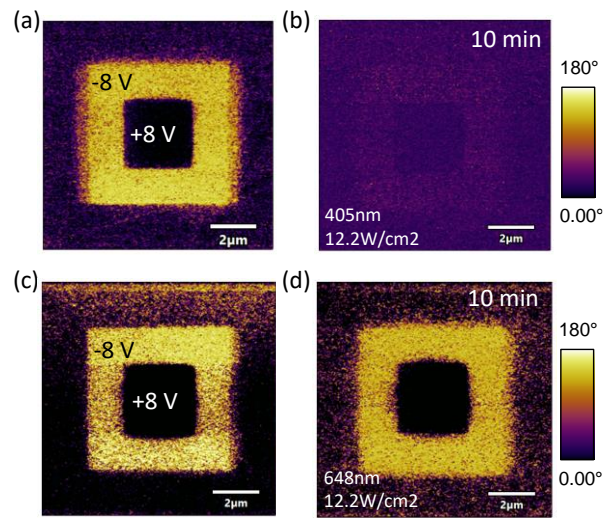

**Fig. S8** PFM phase images collected (a) before and (b) after illumination of 405 nm and 12.2 W/cm<sup>2</sup> for the BTO/SRO sample. PFM phase images collected (c) before and (d) after illumination of 648 nm and 12.2 W/cm<sup>2</sup> for the BTO/SRO sample.

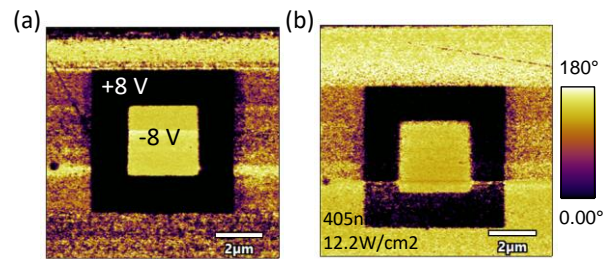

**Fig. S9** PFM phase images collected (a) before and (b) after illumination of 405 nm and 12.2 W/cm<sup>2</sup> for the BTO/LSMO sample 1 mm far from the illuminated area.

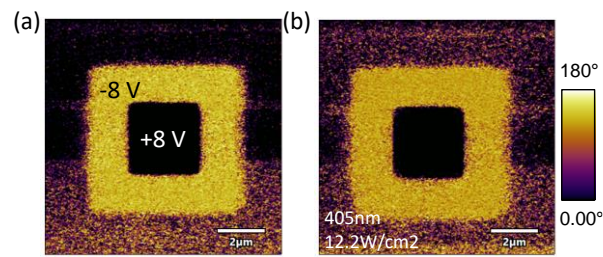

**Fig. S10** PFM phase images collected (a) before and (b) after illumination of 405 nm and 12.2 W/cm<sup>2</sup> for the BTO/SRO sample 1 mm far from the illuminated area.

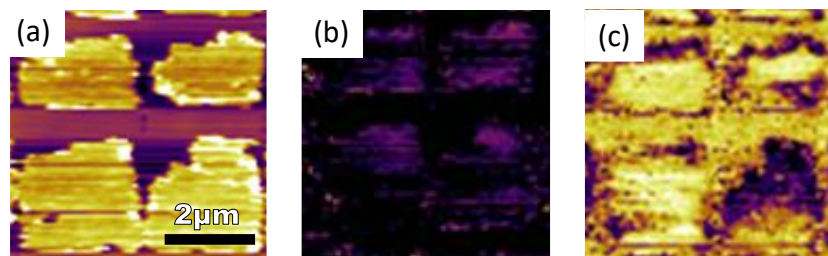

**Fig. S11** (a) Topography image of near 3 by 3 μm<sup>2</sup> contacts. PFM phase images collected (b) before and (c) after illumination of 405 nm and 12.2 W/cm<sup>2</sup> for the BTO/LSMO sample. In (c), it can be observed that the electrodes where the polarization was prepoled towards down [dark in (b)] have switched to bright. Thus, as mentioned in the description of Figure 2 of the main manuscript polarization can switch from down to up in the BTO/LSMO sample after illumination also in presence of Pt top contact.

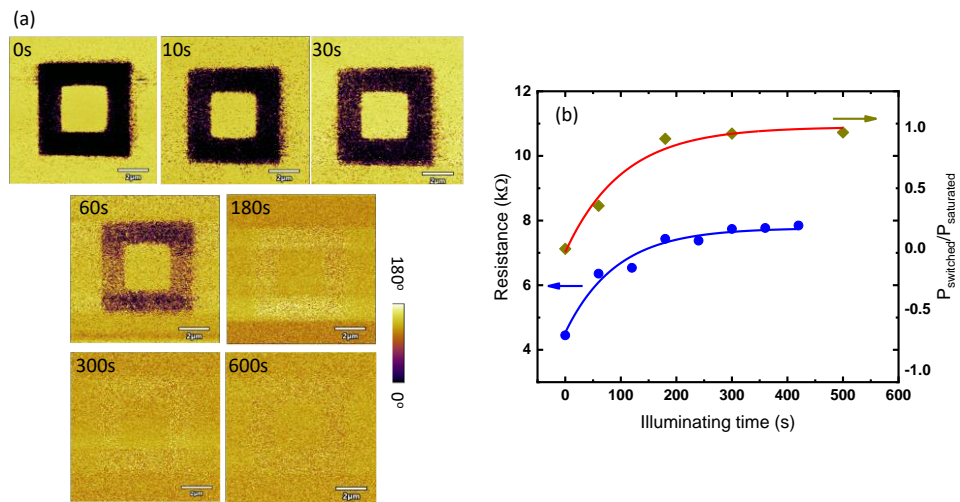

**Fig. S12** (a) PFM phase images collected after indicated illumination time for the BTO/LSMO sample. (b) Resistance as a function of illumination time in Pt/BTO/LSMO junctions. Lines through data points are a guide for the eye.
